# Supplementary material for: Insights into Geographic and Temporal Variation in Fatty Acid Composition of Croton Nuts Using ATR-FTIR
Source: Hindawi journal article supplement (doi:10.1155/2018/4739759), 2018-09-03
Supplement: f1 [file 4739759.f1.pdf]

## Supplementary Material

*Table 1 – Site locations, average nut masses, percent oil, percent loss in mass per day, and initial and final normalized absorbances (from Table 5) at 3009.629 cm<sup>-1</sup>.*

|    |                  |          |          | week 1 | % Oil in | Average | Stdev |
|----|------------------|----------|----------|--------|----------|---------|-------|
|    | Location         | North    | East     | g/nut  | nut meat | L/Width | L/W   |
| 1  | Baringo-Kabarnet | 0.490107 | 35.74342 | 3.6690 | 41.15    | 1.23    | 0.18  |
| 2  | Bomet            | -0.77779 | 35.33565 | 3.7170 | 44.91    | 1.29    | 0.22  |
| 3  | Elementaita      | -0.48716 | 36.15684 | 3.0710 | 46.57    | 1.12    | 0.08  |
| 4  | Emali            | -2.07969 | 37.47314 | 3.9330 | 39.72    | 1.16    | 0.09  |
| 5  | Equator-Nanyuki  | -0.00045 | 37.0712  | 4.6390 | 49.73    | 1.31    | 0.21  |
| 6  | Gachika          | -0.40906 | 37.02309 | 4.4880 | 49.98    | 1.22    | 0.11  |
| 7  | Kabiruini-Nyeri  | -0.39203 | 36.96772 | 2.7970 | 34.27    | 1.20    | 0.08  |
| 8  | Kihato           | -0.14077 | 36.97915 | 3.5680 | 48.89    | 1.22    | 0.07  |
| 9  | Likii            | 0.024982 | 37.07917 | 3.2130 | 46.87    | 1.20    | 0.06  |
| 10 | Loitoktok        | -2.91895 | 37.50583 | 2.3680 | 37.06    | 1.27    | 0.13  |
| 11 | Mahigaini        | -0.54286 | 37.43833 | 2.9200 | 42.17    | 1.21    | 0.14  |
| 12 | Makuyu           | -0.90258 | 37.18748 | 3.5820 | 44.12    | 1.22    | 0.09  |
| 13 | Maragua          | -0.79442 | 37.13122 | 3.0160 | 44.18    | 1.27    | 0.18  |
| 14 | Matanya          | -0.01105 | 37.01289 | 3.1010 | 40.46    | 1.36    | 0.13  |
| 15 | Matuu            | -1.1407  | 37.54812 | 3.2510 | 38.53    | 1.19    | 0.08  |
| 16 | Mbooni           | -1.67413 | 37.45344 | 3.4050 | 31.41    | 1.37    | 0.21  |
| 17 | Meru             | 0.051472 | 37.6456  | 3.7220 | 45.28    | 1.04    | 0.06  |
| 18 | Muhotetu         | 0.242523 | 36.3705  | 4.3800 | 43.45    | 1.16    | 0.12  |
| 19 | MUKURWE-INI-A    | -0.56094 | 37.04876 | 4.1260 | 42.57    | 1.23    | 0.11  |
| 20 | MUKURWE-INI-B    | -0.56094 | 37.04876 | 4.2225 | 37.97    | 1.35    | 0.19  |
| 21 | Mutulani         | -1.71186 | 37.31285 | 3.2588 | 36.04    | 1.24    | 0.13  |
| 22 | Mwea             | -0.53896 | 37.45612 | 5.2130 | 47.51    | 1.21    | 0.12  |
| 23 | Nakuru           | -0.3031  | 36.08003 | 5.5670 | 48.90    | 1.17    | 0.10  |
| 24 | Naro_Moru        | -0.16611 | 37.02125 | 3.5880 | 35.73    | 1.15    | 0.09  |
| 25 | Nyeri            | -0.43767 | 36.95969 | 3.2560 | 46.61    | 1.33    | 0.09  |
| 26 | Ruiru            | -1.14825 | 36.96045 | 4.0090 | 39.97    | 1.04    | 0.07  |
| 27 | Sagana           | -0.66814 | 37.20629 | 3.8580 | 35.66    | 1.32    | 0.09  |
| 28 | Sipili           | 0.406196 | 36.3796  | 5.5320 | 46.20    | 1.33    | 0.13  |
| 29 | Sweet_Waters     | 0.010703 | 37.04236 | 4.7150 | 50.68    | 1.00    | 0.05  |
| 30 | Thika            | -1.03876 | 37.08338 | 3.3180 | (moldy)  | 1.22    | 0.07  |

[illegible]

Table 3 – ATR-FTIR baseline-subtracted absorbance data from Nov., Dec., and Mar.

| ATR-FTIR Data from the start of the study |          |          |          |          |          |          |          |          |          |          |          |          |          |
|-------------------------------------------|----------|----------|----------|----------|----------|----------|----------|----------|----------|----------|----------|----------|----------|
| Nov., 2017 baselined absorbances          |          |          |          |          |          |          |          |          |          |          |          |          |          |
| Wavenumbers:                              | 3019.824 | 3017.785 | 3015.746 | 3013.707 | 3011.668 | 3009.629 | 3007.59  | 3005.551 | 3003.512 | 3001.473 | 2999.434 | 2921.95  | 1743.383 |
| 1 Baringo                                 | 0.020926 | 0.025757 | 0.03128  | 0.036752 | 0.041182 | 0.04357  | 0.043364 | 0.040656 | 0.036104 | 0.0309   | 0.026327 | 0.21623  | 0.283457 |
| 2 Bomet                                   | 0.020942 | 0.02594  | 0.031564 | 0.036997 | 0.041454 | 0.043992 | 0.043715 | 0.040711 | 0.036083 | 0.03102  | 0.026465 | 0.215193 | 0.28774  |
| 3 Elementaita                             | 0.020188 | 0.025136 | 0.03083  | 0.036408 | 0.040948 | 0.043373 | 0.043021 | 0.040167 | 0.035648 | 0.030609 | 0.026116 | 0.215657 | 0.292222 |
| 4 Emali                                   | 0.01993  | 0.024578 | 0.029945 | 0.035362 | 0.039726 | 0.04205  | 0.041799 | 0.038992 | 0.034488 | 0.029674 | 0.025463 | 0.218312 | 0.288565 |
| 5 Eq-Nanyuki                              | 0.020346 | 0.025073 | 0.030501 | 0.035939 | 0.04032  | 0.04267  | 0.042503 | 0.039916 | 0.035584 | 0.030629 | 0.026151 | 0.217387 | 0.290269 |
| 6 Gachika                                 | 0.020761 | 0.025647 | 0.031174 | 0.036706 | 0.041137 | 0.043468 | 0.043236 | 0.040558 | 0.036169 | 0.031225 | 0.026702 | 0.215812 | 0.289172 |
| 7 Kab-Nyeri                               | 0.020002 | 0.024825 | 0.030439 | 0.036126 | 0.040758 | 0.043241 | 0.042932 | 0.040006 | 0.035401 | 0.030282 | 0.025701 | 0.209822 | 0.288625 |
| 8 Kihato                                  | 0.020414 | 0.025362 | 0.030932 | 0.036433 | 0.04087  | 0.043315 | 0.043168 | 0.040472 | 0.036047 | 0.03102  | 0.026419 | 0.215164 | 0.291433 |
| 9 Likii                                   | 0.021909 | 0.026737 | 0.032275 | 0.037853 | 0.042447 | 0.044901 | 0.044602 | 0.041785 | 0.037195 | 0.031956 | 0.027275 | 0.213188 | 0.289492 |
| 10 Loitoktok                              | 0.019038 | 0.023491 | 0.028487 | 0.033647 | 0.037971 | 0.04023  | 0.039935 | 0.037369 | 0.033313 | 0.028836 | 0.024826 | 0.22401  | 0.284424 |
| 11 Mahigaini                              | 0.021279 | 0.026227 | 0.031736 | 0.037274 | 0.04181  | 0.044194 | 0.043792 | 0.040848 | 0.036203 | 0.030967 | 0.026252 | 0.212471 | 0.29243  |
| 12 Makuyu                                 | 0.01921  | 0.023822 | 0.029173 | 0.034442 | 0.038699 | 0.041174 | 0.041224 | 0.038754 | 0.034594 | 0.029984 | 0.02582  | 0.219854 | 0.290004 |
| 13 Maragua                                | 0.020265 | 0.025345 | 0.031041 | 0.036561 | 0.041    | 0.043407 | 0.043141 | 0.040318 | 0.035796 | 0.030743 | 0.026195 | 0.212858 | 0.290535 |
| 14 Matanya                                | 0.019854 | 0.024647 | 0.030031 | 0.035309 | 0.039557 | 0.041917 | 0.041751 | 0.039073 | 0.034745 | 0.029894 | 0.025428 | 0.219664 | 0.291416 |
| 15 Matuu                                  | 0.020374 | 0.025106 | 0.030492 | 0.035859 | 0.040256 | 0.042679 | 0.042403 | 0.039594 | 0.035175 | 0.030274 | 0.025858 | 0.214632 | 0.290843 |
| 16 Mbooni                                 | 0.019821 | 0.024451 | 0.029672 | 0.034846 | 0.039117 | 0.041483 | 0.041354 | 0.038739 | 0.034435 | 0.029769 | 0.025566 | 0.21849  | 0.28936  |
| 17 Meru                                   | 0.021289 | 0.026257 | 0.031914 | 0.037444 | 0.04189  | 0.044341 | 0.044075 | 0.041201 | 0.036564 | 0.031261 | 0.0265   | 0.214364 | 0.291437 |
| 18 Muhotetu                               | 0.020818 | 0.02582  | 0.031502 | 0.037079 | 0.041596 | 0.044093 | 0.043839 | 0.040869 | 0.036097 | 0.030872 | 0.02632  | 0.212098 | 0.287208 |
| 19 MUKURWE-INI-A                          | 0.02038  | 0.025151 | 0.03062  | 0.036205 | 0.040752 | 0.043197 | 0.042986 | 0.040235 | 0.035783 | 0.030695 | 0.025961 | 0.215096 | 0.291772 |
| 20 MUKURWE-INI-B                          | 0.020401 | 0.024979 | 0.030086 | 0.035199 | 0.039549 | 0.042056 | 0.041871 | 0.039123 | 0.034838 | 0.03009  | 0.025713 | 0.219389 | 0.290654 |
| 21 Mutalani                               | 0.019968 | 0.024891 | 0.030301 | 0.035672 | 0.040034 | 0.042373 | 0.042138 | 0.039335 | 0.034855 | 0.02998  | 0.025615 | 0.213614 | 0.285802 |
| 22 Mwea                                   | 0.020304 | 0.024996 | 0.030365 | 0.035706 | 0.040134 | 0.042625 | 0.042486 | 0.039764 | 0.035373 | 0.030569 | 0.026158 | 0.216354 | 0.292021 |
| 23 Nakuru                                 | 0.021315 | 0.026366 | 0.032002 | 0.037494 | 0.042078 | 0.04473  | 0.044578 | 0.041659 | 0.036953 | 0.031806 | 0.027181 | 0.215769 | 0.292226 |
| 24 Naro-Moru                              | 0.019514 | 0.023948 | 0.029035 | 0.034095 | 0.038237 | 0.040569 | 0.040498 | 0.038102 | 0.034147 | 0.029721 | 0.025685 | 0.225648 | 0.289751 |
| 25 Nyeri                                  | 0.020049 | 0.024854 | 0.030276 | 0.035626 | 0.039999 | 0.04251  | 0.042479 | 0.039796 | 0.035326 | 0.030373 | 0.02584  | 0.21695  | 0.291547 |
| 26 Ruiri                                  | 0.020953 | 0.025817 | 0.031356 | 0.037032 | 0.041748 | 0.044264 | 0.043869 | 0.04083  | 0.036215 | 0.031195 | 0.026624 | 0.211075 | 0.290793 |
| 27 Sagana                                 | 0.019564 | 0.02419  | 0.029335 | 0.034346 | 0.038432 | 0.040729 | 0.040666 | 0.038249 | 0.034214 | 0.029789 | 0.025876 | 0.223868 | 0.288037 |
| 28 Sipili                                 | 0.020263 | 0.025209 | 0.030763 | 0.036263 | 0.040789 | 0.043341 | 0.043186 | 0.040366 | 0.035686 | 0.030465 | 0.025855 | 0.214302 | 0.288138 |
| 29 Sweet-Waters                           | 0.021762 | 0.026839 | 0.032474 | 0.03793  | 0.042303 | 0.044694 | 0.044473 | 0.041605 | 0.036931 | 0.031819 | 0.027265 | 0.214582 | 0.288645 |
| 30 Thika                                  | 0.019476 | 0.024438 | 0.030232 | 0.035969 | 0.040475 | 0.042694 | 0.042199 | 0.039332 | 0.034866 | 0.029891 | 0.025426 | 0.213841 | 0.290327 |
| Normalized absorbances:                   |          |          |          |          |          |          |          |          |          |          |          |          |          |
| 1 Baringo                                 | 0.073824 | 0.090867 | 0.110352 | 0.129656 | 0.145285 | 0.153709 | 0.152983 | 0.143429 | 0.12737  | 0.109011 | 0.092878 | 0.762832 | 1        |
| 2 Bomet                                   | 0.072781 | 0.090151 | 0.109696 | 0.128578 | 0.144068 | 0.152888 | 0.151925 | 0.141485 | 0.125401 | 0.107806 | 0.091975 | 0.747873 | 1        |
| 3 Elementaita                             | 0.069084 | 0.086017 | 0.105502 | 0.12459  | 0.140126 | 0.148425 | 0.14722  | 0.137454 | 0.121989 | 0.104746 | 0.08937  | 0.73799  | 1        |
| 4 Emali                                   | 0.069066 | 0.085173 | 0.103772 | 0.122544 | 0.137667 | 0.145721 | 0.144851 | 0.135124 | 0.119516 | 0.102833 | 0.08824  | 0.756544 | 1        |
| 5 Eq-Nanyuki                              | 0.070094 | 0.086378 | 0.105078 | 0.123813 | 0.138906 | 0.147002 | 0.146426 | 0.137514 | 0.12259  | 0.105519 | 0.090092 | 0.748916 | 1        |
| 6 Gachika                                 | 0.071795 | 0.088691 | 0.107804 | 0.126935 | 0.142258 | 0.150319 | 0.149517 | 0.140256 | 0.125078 | 0.107981 | 0.09234  | 0.74631  | 1        |
| 7 Kab-Nyeri                               | 0.069301 | 0.086011 | 0.105462 | 0.125166 | 0.141214 | 0.149817 | 0.148747 | 0.138609 | 0.122654 | 0.104918 | 0.089046 | 0.726971 | 1        |
| 8 Kihato                                  | 0.070047 | 0.087025 | 0.106138 | 0.125013 | 0.140238 | 0.148628 | 0.148123 | 0.138872 | 0.123689 | 0.10644  | 0.090652 | 0.738297 | 1        |
| 9 Likii                                   | 0.075681 | 0.092358 | 0.111488 | 0.130757 | 0.146626 | 0.155103 | 0.15407  | 0.144339 | 0.128484 | 0.110386 | 0.094217 | 0.736421 | 1        |
| 10 Loitoktok                              | 0.066935 | 0.082591 | 0.100157 | 0.118299 | 0.133501 | 0.141444 | 0.140407 | 0.131385 | 0.117124 | 0.101384 | 0.087285 | 0.787592 | 1        |
| 11 Mahigaini                              | 0.072766 | 0.089686 | 0.108525 | 0.127463 | 0.142974 | 0.151127 | 0.149752 | 0.139685 | 0.123801 | 0.105895 | 0.089772 | 0.72657  | 1        |
| 12 Makuyu                                 | 0.06624  | 0.082144 | 0.100595 | 0.118764 | 0.133443 | 0.141977 | 0.14215  | 0.133633 | 0.119288 | 0.103392 | 0.089033 | 0.758107 | 1        |
| 13 Maragua                                | 0.069751 | 0.087236 | 0.106841 | 0.12584  | 0.141119 | 0.149404 | 0.148488 | 0.138772 | 0.123207 | 0.105815 | 0.090161 | 0.732642 | 1        |
| 14 Matanya                                | 0.068129 | 0.084577 | 0.103052 | 0.121164 | 0.135741 | 0.143839 | 0.143269 | 0.13408  | 0.119228 | 0.102582 | 0.087257 | 0.753782 | 1        |
| 15 Matuu                                  | 0.070052 | 0.086321 | 0.10484  | 0.123293 | 0.138411 | 0.146742 | 0.145793 | 0.136135 | 0.120942 | 0.104091 | 0.088907 | 0.737965 | 1        |
| 16 Mbooni                                 | 0.068499 | 0.0845   | 0.102544 | 0.120424 | 0.135185 | 0.143361 | 0.142915 | 0.133878 | 0.119004 | 0.102879 | 0.088354 | 0.75508  | 1        |
| 17 Meru                                   | 0.073048 | 0.090095 | 0.109506 | 0.128481 | 0.143736 | 0.152146 | 0.151233 | 0.141372 | 0.125461 | 0.107265 | 0.090929 | 0.735541 | 1        |
| 18 Muhotetu                               | 0.072484 | 0.0899   | 0.109684 | 0.129102 | 0.144829 | 0.153523 | 0.152639 | 0.142298 | 0.125682 | 0.10749  | 0.091641 | 0.738482 | 1        |
| 19 MUKURWE-INI-A                          | 0.069849 | 0.086201 | 0.104945 | 0.124087 | 0.139671 | 0.148051 | 0.147327 | 0.137899 | 0.12264  | 0.105202 | 0.088977 | 0.737206 | 1        |
| 20 MUKURWE-INI-B                          | 0.07019  | 0.085941 | 0.103511 | 0.121103 | 0.136069 | 0.144694 | 0.144058 | 0.134603 | 0.119861 | 0.103525 | 0.088466 | 0.754812 | 1        |
| 21 Mutalani                               | 0.069867 | 0.087092 | 0.106021 | 0.124814 | 0.140076 | 0.14826  | 0.147438 | 0.13763  | 0.121955 | 0.104898 | 0.089625 | 0.74742  | 1        |
| 22 Mwea                                   | 0.069529 | 0.085597 | 0.103982 | 0.122272 | 0.137435 | 0.145966 | 0.14549  | 0.136168 | 0.121132 | 0.104681 | 0.089576 | 0.740885 | 1        |
| 23 Nakuru                                 | 0.07294  | 0.090225 | 0.109511 | 0.128305 | 0.143991 | 0.153066 | 0.152546 | 0.142557 | 0.126453 | 0.10884  | 0.093014 | 0.738363 | 1        |
| 24 Naro-Moru                              | 0.067347 | 0.08265  | 0.100207 | 0.11767  | 0.131965 | 0.140013 | 0.139768 | 0.131499 | 0.117849 | 0.102574 | 0.088645 | 0.778765 | 1        |
| 25 Nyeri                                  | 0.068768 | 0.085249 | 0.103846 | 0.122196 | 0.137196 | 0.145808 | 0.145702 | 0.136499 | 0.121167 | 0.104179 | 0.088631 | 0.744134 | 1        |
| 26 Ruiri                                  | 0.072055 | 0.088781 | 0.107829 | 0.127348 | 0.143566 | 0.152218 | 0.15086  | 0.140409 | 0.124539 | 0.107276 | 0.091557 | 0.72586  | 1        |
| 27 Sagana                                 | 0.067922 | 0.083982 | 0.101845 | 0.119242 | 0.133427 | 0.141402 | 0.141183 | 0.132792 | 0.118783 | 0.103421 | 0.089836 | 0.77722  | 1        |
| 28 Sipili                                 | 0.070324 | 0.087489 | 0.106765 | 0.125853 | 0.141561 | 0.150418 | 0.14988  | 0.140093 | 0.12385  | 0.105731 | 0.089731 | 0.743748 | 1        |
| 29 Sweet-Waters                           | 0.075394 | 0.092983 | 0.112505 | 0.131407 | 0.146557 | 0.154841 | 0.154075 | 0.144139 | 0.127946 | 0.110236 | 0.094459 | 0.743411 | 1        |
| 30 Thika                                  | 0.067083 | 0.084174 | 0.104131 | 0.123891 | 0.139412 | 0.147055 | 0.14535  | 0.135475 | 0.120092 | 0.102956 | 0.087577 | 0.736552 | 1        |

| ATR-FTIR Data from the middle of the study |          |          |          |          |          |          |          |          |          |          |          |          |          |
|--------------------------------------------|----------|----------|----------|----------|----------|----------|----------|----------|----------|----------|----------|----------|----------|
| Dec., 2017 baselined absorbances           |          |          |          |          |          |          |          |          |          |          |          |          |          |
| Wavenumbers:                               | 3019.824 | 3017.785 | 3015.746 | 3013.707 | 3011.668 | 3009.629 | 3007.59  | 3005.551 | 3003.512 | 3001.473 | 2999.434 | 2921.95  | 1743.383 |
| 1 Baringo                                  | 0.021037 | 0.025551 | 0.03071  | 0.035985 | 0.040401 | 0.04291  | 0.042796 | 0.040118 | 0.035847 | 0.031211 | 0.02696  | 0.218942 | 0.276488 |
| 2 Bomet                                    | 0.021037 | 0.025551 | 0.03071  | 0.035985 | 0.040401 | 0.04291  | 0.042796 | 0.040118 | 0.035847 | 0.031211 | 0.02696  | 0.218942 | 0.276488 |
| 3 Elementaita                              | 0.021618 | 0.026324 | 0.031893 | 0.037491 | 0.041992 | 0.044448 | 0.044225 | 0.041415 | 0.036946 | 0.032007 | 0.027511 | 0.215378 | 0.281613 |
| 4 Emali                                    | 0.021618 | 0.026324 | 0.031893 | 0.037491 | 0.041992 | 0.044448 | 0.044225 | 0.041415 | 0.036946 | 0.032007 | 0.027511 | 0.215378 | 0.281613 |
| 5 Gachika                                  | 0.02018  | 0.024934 | 0.03041  | 0.035952 | 0.040464 | 0.042961 | 0.042853 | 0.04016  | 0.035762 | 0.030886 | 0.026479 | 0.214826 | 0.285925 |
| 6 Kihato                                   | 0.019875 | 0.02453  | 0.030016 | 0.035383 | 0.039605 | 0.041924 | 0.041833 | 0.039335 | 0.035066 | 0.030126 | 0.025689 | 0.212559 | 0.27079  |
| 7 Likii                                    | 0.019943 | 0.024689 | 0.03006  | 0.035342 | 0.039612 | 0.041935 | 0.041804 | 0.039388 | 0.035424 | 0.030877 | 0.026634 | 0.221976 | 0.291171 |
| 8 Loitoktok                                | 0.01794  | 0.021693 | 0.025921 | 0.030054 | 0.033505 | 0.03562  | 0.035688 | 0.03362  | 0.030209 | 0.026503 | 0.023198 | 0.186229 | 0.214926 |
| 9 Mahigaini                                | 0.020612 | 0.025382 | 0.030812 | 0.036163 | 0.040571 | 0.043074 | 0.042881 | 0.040111 | 0.035718 | 0.030836 | 0.026343 | 0.217089 | 0.291151 |
| 10 Maragua                                 | 0.019978 | 0.024674 | 0.030032 | 0.035397 | 0.039723 | 0.042059 | 0.041827 | 0.039109 | 0.034771 | 0.029991 | 0.025705 | 0.220803 | 0.288584 |
| 11 Mbooni                                  | 0.020894 | 0.025951 | 0.03156  | 0.037031 | 0.041448 | 0.043738 | 0.043373 | 0.040666 | 0.03638  | 0.031408 | 0.026709 | 0.215048 | 0.288679 |
| 12 Meru                                    | 0.021287 | 0.026063 | 0.031705 | 0.037302 | 0.041776 | 0.044165 | 0.043887 | 0.041058 | 0.036469 | 0.031426 | 0.026953 | 0.216295 | 0.290811 |
| 13 Muhotetu                                | 0.020019 | 0.024864 | 0.030371 | 0.035824 | 0.040254 | 0.042774 | 0.042655 | 0.039867 | 0.035389 | 0.030427 | 0.025879 | 0.213506 | 0.291064 |
| 14 MUKURWE-INI-B                           | 0.020003 | 0.024776 | 0.030308 | 0.0358   | 0.040119 | 0.042348 | 0.042082 | 0.039461 | 0.035227 | 0.03044  | 0.026077 | 0.220362 | 0.291666 |
| 15 Mwaa                                    | 0.016308 | 0.020041 | 0.023968 | 0.027831 | 0.031261 | 0.033362 | 0.033325 | 0.031289 | 0.028126 | 0.024607 | 0.021347 | 0.164762 | 0.189519 |
| 16 Ruiri                                   | 0.020319 | 0.025108 | 0.030548 | 0.036068 | 0.040572 | 0.042966 | 0.04277  | 0.040125 | 0.03584  | 0.030992 | 0.026417 | 0.217482 | 0.29274  |
| 17 Sipili                                  | 0.020003 | 0.02473  | 0.030246 | 0.03585  | 0.040511 | 0.043039 | 0.042696 | 0.039753 | 0.035171 | 0.030198 | 0.025754 | 0.216064 | 0.290497 |
| 18 Sweet-Waters                            | 0.020106 | 0.025186 | 0.030931 | 0.036433 | 0.040674 | 0.04293  | 0.042642 | 0.039849 | 0.035491 | 0.030708 | 0.026289 | 0.212335 | 0.281656 |
| 19 Thika                                   | 0.020843 | 0.025699 | 0.031353 | 0.03692  | 0.041379 | 0.04389  | 0.043768 | 0.04099  | 0.036502 | 0.031554 | 0.027124 | 0.214386 | 0.289455 |
| Normalized absorbances:                    |          |          |          |          |          |          |          |          |          |          |          |          |          |
| 1 Baringo                                  | 0.076086 | 0.092413 | 0.111072 | 0.13015  | 0.146122 | 0.155197 | 0.154784 | 0.145099 | 0.129651 | 0.112884 | 0.097509 | 0.791868 | 1        |
| 2 Bomet                                    | 0.076086 | 0.092413 | 0.111072 | 0.13015  | 0.146122 | 0.155197 | 0.154784 | 0.145099 | 0.129651 | 0.112884 | 0.097509 | 0.791868 | 1        |
| 3 Elementaita                              | 0.076765 | 0.093476 | 0.113251 | 0.13313  | 0.149112 | 0.157834 | 0.157042 | 0.147064 | 0.131194 | 0.113656 | 0.097691 | 0.764801 | 1        |
| 4 Emali                                    | 0.076765 | 0.093476 | 0.113251 | 0.13313  | 0.149112 | 0.157834 | 0.157042 | 0.147064 | 0.131194 | 0.113656 | 0.097691 | 0.764801 | 1        |
| 5 Gachika                                  | 0.070578 | 0.087205 | 0.106357 | 0.125739 | 0.14152  | 0.150253 | 0.149875 | 0.140456 | 0.125075 | 0.108021 | 0.092608 | 0.751337 | 1        |
| 6 Kihato                                   | 0.073396 | 0.090587 | 0.110846 | 0.130666 | 0.146257 | 0.154821 | 0.154485 | 0.14526  | 0.129495 | 0.111252 | 0.094867 | 0.784959 | 1        |
| 7 Likii                                    | 0.068492 | 0.084792 | 0.103238 | 0.121379 | 0.136044 | 0.144022 | 0.143572 | 0.135274 | 0.12166  | 0.106044 | 0.091472 | 0.762356 | 1        |
| 8 Loitoktok                                | 0.083471 | 0.100932 | 0.120604 | 0.139834 | 0.155891 | 0.165731 | 0.166048 | 0.156426 | 0.140555 | 0.123312 | 0.107935 | 0.86648  | 1        |
| 9 Mahigaini                                | 0.070795 | 0.087178 | 0.105828 | 0.124207 | 0.139347 | 0.147944 | 0.147281 | 0.137767 | 0.122679 | 0.105911 | 0.090479 | 0.745623 | 1        |
| 10 Maragua                                 | 0.069228 | 0.0855   | 0.104067 | 0.122658 | 0.137648 | 0.145743 | 0.144939 | 0.13552  | 0.120488 | 0.103925 | 0.089073 | 0.765126 | 1        |
| 11 Mbooni                                  | 0.072378 | 0.089896 | 0.109326 | 0.128277 | 0.143578 | 0.151511 | 0.150246 | 0.140869 | 0.126022 | 0.108799 | 0.092521 | 0.744938 | 1        |
| 12 Meru                                    | 0.073199 | 0.089622 | 0.109023 | 0.128269 | 0.143653 | 0.151868 | 0.150912 | 0.141184 | 0.125404 | 0.108063 | 0.092682 | 0.743765 | 1        |
| 13 Muhotetu                                | 0.068779 | 0.085425 | 0.104345 | 0.123079 | 0.138299 | 0.146957 | 0.146549 | 0.13697  | 0.121585 | 0.104537 | 0.088912 | 0.733536 | 1        |
| 14 MUKURWE-INI-B                           | 0.068582 | 0.084946 | 0.103913 | 0.122743 | 0.137551 | 0.145193 | 0.144281 | 0.135295 | 0.120779 | 0.104366 | 0.089407 | 0.755529 | 1        |
| 15 Mwaa                                    | 0.086049 | 0.105747 | 0.126468 | 0.146851 | 0.164949 | 0.176035 | 0.17584  | 0.165097 | 0.148407 | 0.129839 | 0.112638 | 0.869369 | 1        |
| 16 Ruiri                                   | 0.06941  | 0.085769 | 0.104352 | 0.123208 | 0.138594 | 0.146772 | 0.146102 | 0.137067 | 0.122429 | 0.105869 | 0.09024  | 0.742919 | 1        |
| 17 Sipili                                  | 0.068858 | 0.08513  | 0.104118 | 0.123409 | 0.139454 | 0.148156 | 0.146976 | 0.136845 | 0.121072 | 0.103953 | 0.088655 | 0.743774 | 1        |
| 18 Sweet-Waters                            | 0.071385 | 0.089421 | 0.109818 | 0.129353 | 0.14441  | 0.15242  | 0.151397 | 0.141481 | 0.126008 | 0.109027 | 0.093337 | 0.753881 | 1        |
| 19 Thika                                   | 0.072008 | 0.088784 | 0.108317 | 0.12755  | 0.142955 | 0.15163  | 0.151208 | 0.141611 | 0.126106 | 0.109012 | 0.093707 | 0.740654 | 1        |

| ATR-FTIR Data from the end of the study        |                                  |          |          |          |          |          |          |          |          |          |          |          |          |          |
|------------------------------------------------|----------------------------------|----------|----------|----------|----------|----------|----------|----------|----------|----------|----------|----------|----------|----------|
|                                                |                                  |          |          |          |          |          |          |          |          |          |          |          |          |          |
|                                                | Mar., 2018 baselined absorbances |          |          |          |          |          |          |          |          |          |          |          |          |          |
|                                                | Wavenumbers:                     | 3019.824 | 3017.785 | 3015.746 | 3013.707 | 3011.668 | 3009.629 | 3007.59  | 3005.551 | 3003.512 | 3001.473 | 2999.434 | 2921.95  | 1743.383 |
| 1                                              | Baringo                          | 0.019856 | 0.024522 | 0.029961 | 0.035463 | 0.039965 | 0.04247  | 0.042373 | 0.039741 | 0.035351 | 0.030411 | 0.025993 | 0.218569 | 0.292513 |
| 2                                              | Bomet                            | 0.019699 | 0.024545 | 0.030199 | 0.035737 | 0.040219 | 0.042692 | 0.042336 | 0.03929  | 0.034715 | 0.029806 | 0.02539  | 0.21263  | 0.286928 |
| 3                                              | Elementaita                      | 0.019814 | 0.024579 | 0.029977 | 0.035535 | 0.040157 | 0.042693 | 0.042497 | 0.039658 | 0.03512  | 0.030114 | 0.025558 | 0.213503 | 0.288053 |
| 4                                              | Emali                            | 0.01982  | 0.024648 | 0.030256 | 0.035817 | 0.040353 | 0.042848 | 0.042607 | 0.039781 | 0.035347 | 0.03045  | 0.026025 | 0.215162 | 0.289738 |
| 5                                              | Eq-Nanyuki                       | 0.01912  | 0.023659 | 0.028797 | 0.034031 | 0.03852  | 0.041157 | 0.0411   | 0.038417 | 0.034075 | 0.029332 | 0.025061 | 0.219149 | 0.289031 |
| 6                                              | Gachika                          | 0.019707 | 0.024426 | 0.029784 | 0.03501  | 0.039194 | 0.0415   | 0.041278 | 0.03852  | 0.034131 | 0.029314 | 0.025094 | 0.217021 | 0.281386 |
| 7                                              | Kab-Nyeri                        | 0.020105 | 0.025034 | 0.030784 | 0.036457 | 0.040959 | 0.043395 | 0.043133 | 0.040295 | 0.035811 | 0.030819 | 0.026231 | 0.214025 | 0.289819 |
| 8                                              | Kihato                           | 0.020654 | 0.025296 | 0.030553 | 0.035873 | 0.040295 | 0.042757 | 0.042626 | 0.040014 | 0.035675 | 0.030772 | 0.026396 | 0.219401 | 0.289148 |
| 9                                              | Likii                            | 0.019357 | 0.024153 | 0.029641 | 0.03503  | 0.039271 | 0.041501 | 0.041213 | 0.03855  | 0.034341 | 0.029611 | 0.025307 | 0.2203   | 0.29209  |
| 10                                             | Loitoktok                        | 0.020074 | 0.024913 | 0.030296 | 0.035683 | 0.04013  | 0.042534 | 0.042311 | 0.039603 | 0.035247 | 0.030339 | 0.025792 | 0.212447 | 0.2877   |
| 11                                             | Mahigaini                        | 0.020417 | 0.025267 | 0.030711 | 0.036143 | 0.040564 | 0.042863 | 0.042505 | 0.039687 | 0.035143 | 0.03008  | 0.025563 | 0.214701 | 0.287699 |
| 12                                             | Makuyu                           | 0.01908  | 0.023807 | 0.029209 | 0.034474 | 0.038552 | 0.040725 | 0.040525 | 0.037948 | 0.033831 | 0.029252 | 0.02501  | 0.218051 | 0.288967 |
| 13                                             | Maragua                          | 0.019425 | 0.024237 | 0.029564 | 0.034837 | 0.039344 | 0.041986 | 0.041892 | 0.039216 | 0.034945 | 0.03017  | 0.025835 | 0.217177 | 0.290293 |
| 14                                             | Matanya                          | 0.019828 | 0.024668 | 0.03015  | 0.035598 | 0.040016 | 0.042405 | 0.042128 | 0.039372 | 0.035051 | 0.030165 | 0.025624 | 0.214347 | 0.290056 |
| 15                                             | Matuu                            | 0.020433 | 0.025019 | 0.030256 | 0.035656 | 0.040184 | 0.042745 | 0.042614 | 0.039848 | 0.035392 | 0.030479 | 0.026033 | 0.217799 | 0.282254 |
| 16                                             | Mbooni                           | 0.02003  | 0.024634 | 0.029867 | 0.035223 | 0.039689 | 0.042217 | 0.042105 | 0.039374 | 0.034962 | 0.03014  | 0.025823 | 0.2153   | 0.285193 |
| 17                                             | Meru                             | 0.019889 | 0.024684 | 0.030195 | 0.035706 | 0.040216 | 0.042646 | 0.04228  | 0.039408 | 0.035016 | 0.030163 | 0.025728 | 0.215543 | 0.28955  |
| 18                                             | Muhotetu                         | 0.019207 | 0.023777 | 0.028888 | 0.03419  | 0.038688 | 0.041217 | 0.041071 | 0.038426 | 0.034168 | 0.029395 | 0.02502  | 0.219549 | 0.289623 |
| 19                                             | MUKURWE-INI-A                    | 0.019924 | 0.024722 | 0.030182 | 0.035589 | 0.040117 | 0.042748 | 0.042573 | 0.039668 | 0.035153 | 0.030234 | 0.025762 | 0.215014 | 0.292441 |
| 20                                             | MUKURWE-INI-B                    | 0.019763 | 0.024565 | 0.030156 | 0.035797 | 0.040298 | 0.042653 | 0.042388 | 0.039628 | 0.035154 | 0.030085 | 0.025468 | 0.212769 | 0.290658 |
| 21                                             | Mutalani                         | 0.019964 | 0.024643 | 0.030005 | 0.035432 | 0.039825 | 0.042187 | 0.041974 | 0.039246 | 0.034822 | 0.02987  | 0.025367 | 0.215947 | 0.287935 |
| 22                                             | Mwea                             | 0.019316 | 0.023875 | 0.029066 | 0.034283 | 0.038516 | 0.040825 | 0.040798 | 0.038416 | 0.034229 | 0.029442 | 0.025107 | 0.22173  | 0.288945 |
| 23                                             | Nakuru                           | 0.020046 | 0.024808 | 0.030228 | 0.03566  | 0.040099 | 0.042566 | 0.042338 | 0.039454 | 0.034946 | 0.030067 | 0.025714 | 0.217037 | 0.291378 |
| 24                                             | Naro-Moru                        | 0.020223 | 0.025105 | 0.030673 | 0.036327 | 0.040781 | 0.043226 | 0.042956 | 0.040084 | 0.035526 | 0.030542 | 0.02599  | 0.212297 | 0.281239 |
| 25                                             | Nyeri                            | 0.0195   | 0.024424 | 0.030051 | 0.035573 | 0.040017 | 0.042412 | 0.042192 | 0.039463 | 0.035012 | 0.02992  | 0.02529  | 0.21291  | 0.289211 |
| 26                                             | Ruiri                            | 0.019909 | 0.024716 | 0.030199 | 0.035772 | 0.040412 | 0.043031 | 0.04297  | 0.040213 | 0.035478 | 0.030147 | 0.025447 | 0.213225 | 0.291302 |
| 27                                             | Sagana                           | 0.019788 | 0.024762 | 0.03042  | 0.036025 | 0.040582 | 0.042978 | 0.04265  | 0.039816 | 0.035314 | 0.030273 | 0.025745 | 0.213513 | 0.289308 |
| 28                                             | Sipili                           | 0.020039 | 0.024678 | 0.029765 | 0.035092 | 0.03972  | 0.042323 | 0.042232 | 0.039603 | 0.035254 | 0.030271 | 0.025612 | 0.215097 | 0.289853 |
| 29                                             | Sweet-Waters                     | 0.019419 | 0.024206 | 0.029711 | 0.035029 | 0.039305 | 0.041666 | 0.041494 | 0.038956 | 0.034808 | 0.029984 | 0.025514 | 0.216881 | 0.288557 |
| 30                                             | Thika                            | 0.023247 | 0.028062 | 0.033556 | 0.038897 | 0.043216 | 0.045602 | 0.045327 | 0.042548 | 0.038201 | 0.033392 | 0.029029 | 0.221377 | 0.243766 |
| 30                                             | Thika (rep)                      | 0.023789 | 0.028321 | 0.033432 | 0.038734 | 0.043239 | 0.045828 | 0.04582  | 0.043229 | 0.038907 | 0.033993 | 0.029397 | 0.220235 | 0.242704 |
| Thika seeds had all grown moldy; data not used |                                  |          |          |          |          |          |          |          |          |          |          |          |          |          |
|                                                | Normalized absorbances:          |          |          |          |          |          |          |          |          |          |          |          |          |          |
| 1                                              | Baringo                          | 0.067881 | 0.083832 | 0.102426 | 0.121236 | 0.136626 | 0.14519  | 0.144859 | 0.135861 | 0.120853 | 0.103965 | 0.088861 | 0.747211 | 1        |
| 2                                              | Bomet                            | 0.068655 | 0.085544 | 0.105249 | 0.12455  | 0.140171 | 0.14879  | 0.147549 | 0.136933 | 0.120989 | 0.10388  | 0.088489 | 0.741057 | 1        |
| 3                                              | Elementaita                      | 0.068786 | 0.085328 | 0.104068 | 0.123363 | 0.139408 | 0.148212 | 0.147532 | 0.137676 | 0.121922 | 0.104543 | 0.088727 | 0.741193 | 1        |
| 4                                              | Emali                            | 0.068407 | 0.08507  | 0.104425 | 0.123619 | 0.139274 | 0.147885 | 0.147054 | 0.1373   | 0.121996 | 0.105095 | 0.089823 | 0.742609 | 1        |
| 5                                              | Eq-Nanyuki                       | 0.066152 | 0.081856 | 0.099633 | 0.117742 | 0.133273 | 0.142396 | 0.142199 | 0.132917 | 0.117894 | 0.101484 | 0.086707 | 0.75822  | 1        |
| 6                                              | Gachika                          | 0.070035 | 0.086806 | 0.105847 | 0.12442  | 0.139289 | 0.147484 | 0.146695 | 0.136894 | 0.121296 | 0.104177 | 0.08918  | 0.771257 | 1        |
| 7                                              | Kab-Nyeri                        | 0.069371 | 0.086378 | 0.106218 | 0.125792 | 0.141326 | 0.149731 | 0.148827 | 0.139035 | 0.123563 | 0.106339 | 0.090508 | 0.738478 | 1        |
| 8                                              | Kihato                           | 0.071431 | 0.087485 | 0.105666 | 0.124064 | 0.139358 | 0.147872 | 0.147419 | 0.138386 | 0.12338  | 0.106423 | 0.091289 | 0.758784 | 1        |
| 9                                              | Likii                            | 0.066271 | 0.08269  | 0.101479 | 0.119929 | 0.134448 | 0.142083 | 0.141097 | 0.13198  | 0.11757  | 0.101376 | 0.086641 | 0.75422  | 1        |
| 10                                             | Loitoktok                        | 0.069774 | 0.086594 | 0.105304 | 0.124029 | 0.139486 | 0.147842 | 0.147066 | 0.137654 | 0.122513 | 0.105454 | 0.089649 | 0.738432 | 1        |
| 11                                             | Mahigaini                        | 0.070967 | 0.087824 | 0.106747 | 0.125628 | 0.140995 | 0.148986 | 0.147741 | 0.137946 | 0.122152 | 0.104554 | 0.088853 | 0.74627  | 1        |
| 12                                             | Makuyu                           | 0.066028 | 0.082387 | 0.101081 | 0.119301 | 0.133413 | 0.140933 | 0.140241 | 0.131323 | 0.117076 | 0.10123  | 0.08655  | 0.754588 | 1        |
| 13                                             | Maragua                          | 0.066915 | 0.083492 | 0.101842 | 0.120006 | 0.135532 | 0.144633 | 0.144309 | 0.135091 | 0.120378 | 0.103929 | 0.088996 | 0.74813  | 1        |
| 14                                             | Matanya                          | 0.068359 | 0.085046 | 0.103945 | 0.122728 | 0.13796  | 0.146196 | 0.145241 | 0.135739 | 0.120842 | 0.103997 | 0.088342 | 0.738985 | 1        |
| 15                                             | Matuu                            | 0.072392 | 0.08864  | 0.107194 | 0.126326 | 0.142368 | 0.151442 | 0.150977 | 0.141178 | 0.125391 | 0.107984 | 0.092233 | 0.771642 | 1        |
| 16                                             | Mbooni                           | 0.070233 | 0.086377 | 0.104726 | 0.123506 | 0.139165 | 0.14803  | 0.147637 | 0.138061 | 0.122591 | 0.105683 | 0.090546 | 0.754927 | 1        |
| 17                                             | Meru                             | 0.068689 | 0.08525  | 0.104283 | 0.123315 | 0.138891 | 0.147284 | 0.14602  | 0.136101 | 0.120932 | 0.104172 | 0.088855 | 0.744407 | 1        |
| 18                                             | Muhotetu                         | 0.066317 | 0.082096 | 0.099743 | 0.11805  | 0.133581 | 0.142313 | 0.141808 | 0.132676 | 0.117974 | 0.101494 | 0.086388 | 0.758051 | 1        |
| 19                                             | MUKURWE-INI-A                    | 0.06813  | 0.084537 | 0.103207 | 0.121696 | 0.13718  | 0.146176 | 0.145578 | 0.135644 | 0.120205 | 0.103385 | 0.088093 | 0.735239 | 1        |
| 20                                             | MUKURWE-INI-B                    | 0.067994 | 0.084515 | 0.103751 | 0.123158 | 0.138644 | 0.146746 | 0.145835 | 0.136339 | 0.120946 | 0.103507 | 0.087622 | 0.732025 | 1        |
| 21                                             | Mutalani                         | 0.069335 | 0.085585 | 0.104208 | 0.123056 | 0.138312 | 0.146516 | 0.145776 | 0.136302 | 0.120937 | 0.103739 | 0.0881   | 0.749985 | 1        |
| 22                                             | Mwea                             | 0.06685  | 0.082628 | 0.100594 | 0.118649 | 0.133299 | 0.14129  | 0.141196 | 0.132953 | 0.118462 | 0.101895 | 0.086892 | 0.767378 | 1        |
| 23                                             | Nakuru                           | 0.068797 | 0.08514  | 0.103742 | 0.122384 | 0.137618 | 0.146085 | 0.145303 | 0.135405 | 0.119934 | 0.103189 | 0.08825  | 0.744864 | 1        |
| 24                                             | Naro-Moru                        | 0.071907 | 0.089266 | 0.109064 | 0.128848 | 0.145005 | 0.153698 | 0.152738 | 0.142526 | 0.12632  | 0.108598 | 0.092413 | 0.754863 | 1        |
| 25                                             | Nyeri                            | 0.067425 | 0.08445  | 0.103907 | 0.123    | 0.138366 | 0.146647 | 0.145887 | 0.136451 | 0.12106  | 0.103454 | 0.087445 | 0.736175 | 1        |
| 26                                             | Ruiri                            | 0.068345 | 0.084847 | 0.103669 | 0.1228   | 0.138729 | 0.14772  | 0.14751  | 0.138046 | 0.121791 | 0.103491 | 0.087356 | 0.731972 | 1        |
| 27                                             | Sagana                           | 0.068398 | 0.08559  | 0.105147 | 0.124521 | 0.140273 | 0.148554 | 0.147421 | 0.137625 | 0.122064 | 0.104639 | 0.088988 | 0.738013 | 1        |
| 28                                             | Sipili                           | 0.069135 | 0.08514  | 0.10269  | 0.121068 | 0.137035 | 0.1460   |          |          |          |          |          |          |          |

Table 4a – Example GC-MS data with retention times, area counts, and compound identity.

| GC-MS Data                                                                              |          |          |        |                 |                                                          |          |      |       |        |            |          |         |
|-----------------------------------------------------------------------------------------|----------|----------|--------|-----------------|----------------------------------------------------------|----------|------|-------|--------|------------|----------|---------|
| Example workup of the GC-MS data for Baringo from solvent-extracted oil for March, 2018 |          |          |        |                 |                                                          |          |      |       |        |            |          |         |
| Peak #                                                                                  | Ret Time | Area     | % Area | Baringo-re_3_18 |                                                          |          |      |       |        |            |          |         |
| 1                                                                                       | 22.164   | 288558   | 0.034  | C14:0           | lon 292.30 (292.00 to 293.00): Baringo-re_3_18.D\data.ms |          |      |       |        |            |          |         |
| 2                                                                                       | 28.081   | 105163   | 0.013  | C16:2           | Peak #                                                   | Ret Time | Type | Width | Area   | Start Time | End Time |         |
| 3                                                                                       | 28.176   | 16061    | 0.002  | C16:1           | 1                                                        | 34.178   | M    | 0.068 | 262694 | 34.093     | 34.258   | 0.32983 |
| 4                                                                                       | 28.802   | 36039013 | 4.302  | C16:0           | lon 296.30 (296.00 to 297.00): Baringo-re_3_18.D\data.ms |          |      |       |        |            |          |         |
| 5                                                                                       | 31.083   | 52605    | 0.006  | C17:2           | 1                                                        | 34.181   | M    | 0.062 | 533759 | 34.111     | 34.398   |         |
| 6                                                                                       | 31.152   | 32748    | 0.004  | C17:1           |                                                          |          |      |       | 796453 |            |          |         |
| 7                                                                                       | 31.934   | 181001   | 0.022  | C17:0           |                                                          |          |      |       |        |            |          |         |
| 8                                                                                       | 34.051   | 6.18E+08 | 73.780 | C18:2           |                                                          |          |      |       |        |            |          |         |
| 9                                                                                       | 34.176   | 1.21E+08 | 14.420 | C18:1/18:3      |                                                          |          |      |       |        |            |          |         |
| 10                                                                                      | 34.323   | 11902525 | 1.421  | C18:1           |                                                          |          |      |       |        |            |          |         |
| 11                                                                                      | 34.962   | 40297198 | 4.810  | C18:0           |                                                          |          |      |       |        |            |          |         |
| 12                                                                                      | 36.71    | 1139067  | 0.136  | C18:2           |                                                          |          |      |       |        |            |          |         |
| 13                                                                                      | 39.732   | 496604   | 0.059  | C20:2           |                                                          |          |      |       |        |            |          |         |
| 14                                                                                      | 39.886   | 6366325  | 0.760  | C20:1           |                                                          |          |      |       |        |            |          |         |
| 15                                                                                      | 40.645   | 1799203  | 0.215  | C20:0           |                                                          |          |      |       |        |            |          |         |
| 16                                                                                      | 43.474   | 23674    | 0.003  | C21:2?          |                                                          |          |      |       |        |            |          |         |
| 17                                                                                      | 43.5     | 11994    | 0.001  | C21:1?          |                                                          |          |      |       |        |            |          |         |
| 18                                                                                      | 43.853   | 11679    | 0.001  | C21:0?          |                                                          |          |      |       |        |            |          |         |
| 19                                                                                      | 45.892   | 50910    | 0.006  | C22:2?          |                                                          |          |      |       |        |            |          |         |
| 20                                                                                      | 46.12    | 24209    | 0.003  | C22:1?          |                                                          |          |      |       |        |            |          |         |
| 21                                                                                      | 46.496   | 16678    | 0.002  | C22:0?          |                                                          |          |      |       |        |            |          |         |
|                                                                                         |          | 8.38E+08 |        |                 |                                                          |          |      |       |        |            |          |         |

Table 4b – Summary of GC-MS relative percentage of each component at each location.

| Raw GC-MS FAME percentages for March by solvent extraction |            |       |       |       |       |       |       |       |        |       |        |        |       |        |       |       |       |
|------------------------------------------------------------|------------|-------|-------|-------|-------|-------|-------|-------|--------|-------|--------|--------|-------|--------|-------|-------|-------|
| Site #                                                     | Site       | C14:0 | C16:2 | C16:1 | C16:0 | C17:2 | C17:1 | C17:0 | C18:2a | C18:3 | C18:1a | C18:1b | C18:0 | C18:2b | C20:2 | C20:1 | C20:0 |
| 1                                                          | Baringo    | 0.034 | 0.013 | 0.002 | 4.302 | 0.006 | 0.004 | 0.022 | 73.780 | 4.756 | 9.664  | 1.421  | 4.810 | 0.136  | 0.059 | 0.760 | 0.215 |
| 2                                                          | Bomet      | 0.048 | 0.007 | 0.004 | 3.444 | 0.011 | 0.004 | 0.031 | 76.381 | 7.139 | 5.741  | 0.803  | 4.475 | 0.118  | 0.257 | 1.030 | 0.398 |
| 3                                                          | Element    | 0.014 | 0.001 | 0.000 | 3.183 | 0.000 | 0.000 | 0.006 | 78.346 | 5.015 | 7.408  | 0.995  | 4.235 | 0.063  | 0.060 | 0.524 | 0.134 |
| 4                                                          | Emali      | 0.018 | 0.003 | 0.002 | 3.231 | 0.002 | 0.001 | 0.009 | 79.019 | 3.870 | 7.932  | 0.855  | 4.026 | 0.070  | 0.089 | 0.627 | 0.181 |
| 5                                                          | Eq-Nanyuki | 0.017 | 0.002 | 0.000 | 3.420 | 0.001 | 0.000 | 0.007 | 74.200 | 3.279 | 11.101 | 0.984  | 6.120 | 0.058  | 0.034 | 0.579 | 0.183 |
| 6                                                          | Gachika    | 0.060 | 0.018 | 0.017 | 5.024 | 0.002 | 0.001 | 0.008 | 76.960 | 5.699 | 5.023  | 1.234  | 4.653 | 0.063  | 0.171 | 0.597 | 0.414 |
| 7                                                          | Kab-Nyeri  | 0.020 | 0.001 | 0.000 | 3.113 | 0.001 | 0.000 | 0.010 | 78.976 | 5.584 | 6.716  | 0.900  | 3.889 | 0.046  | 0.063 | 0.487 | 0.156 |
| 8                                                          | Kihato     | 0.022 | 0.003 | 0.002 | 2.265 | 0.006 | 0.004 | 0.004 | 77.130 | 5.883 | 10.247 | 1.184  | 3.089 | 0.008  | 0.016 | 0.029 | 0.024 |
| 9                                                          | Likii      | 0.012 | 0.001 | 0.000 | 5.527 | 0.000 | 0.001 | 0.007 | 72.211 | 7.296 | 9.090  | 1.218  | 4.232 | 0.041  | 0.020 | 0.257 | 0.068 |
| 10                                                         | Loitoktok  | 0.033 | 0.006 | 0.003 | 4.246 | 0.006 | 0.001 | 0.017 | 76.503 | 6.168 | 6.720  | 1.182  | 3.741 | 0.100  | 0.150 | 0.873 | 0.241 |
| 11                                                         | Mahigaini  | 0.016 | 0.001 | 0.000 | 3.017 | 0.001 | 0.000 | 0.004 | 77.721 | 9.574 | 4.995  | 1.133  | 3.326 | 0.021  | 0.013 | 0.103 | 0.045 |
| 12                                                         | Makuyu     | 0.015 | 0.003 | 0.002 | 3.516 | 0.001 | 0.002 | 0.002 | 71.635 | 9.116 | 10.406 | 1.754  | 3.289 | 0.016  | 0.028 | 0.120 | 0.046 |
| 13                                                         | Maragua    | 0.029 | 0.001 | 0.001 | 3.739 | 0.001 | 0.000 | 0.009 | 73.566 | 6.585 | 9.588  | 0.976  | 4.550 | 0.060  | 0.052 | 0.628 | 0.186 |
| 14                                                         | Matanya    | 0.006 | 0.001 | 0.000 | 2.625 | 0.001 | 0.000 | 0.002 | 78.833 | 6.212 | 7.508  | 1.584  | 3.029 | 0.018  | 0.008 | 0.105 | 0.028 |
| 15                                                         | Matuu      | 0.052 | 0.012 | 0.005 | 3.635 | 0.005 | 0.002 | 0.017 | 75.385 | 4.406 | 9.004  | 1.019  | 5.260 | 0.077  | 0.082 | 0.721 | 0.260 |
| 16                                                         | Mbooni     | 0.010 | 0.000 | 0.000 | 2.811 | 0.000 | 0.000 | 0.002 | 79.083 | 4.905 | 7.494  | 1.143  | 3.790 | 0.038  | 0.050 | 0.482 | 0.166 |
| 17                                                         | Meru       | 0.036 | 0.003 | 0.002 | 3.665 | 0.005 | 0.001 | 0.014 | 80.935 | 3.021 | 5.478  | 0.891  | 4.437 | 0.085  | 0.187 | 0.880 | 0.322 |
| 18                                                         | Muhotetu   | 0.029 | 0.002 | 0.000 | 4.093 | 0.001 | 0.000 | 0.009 | 75.283 | 3.066 | 10.021 | 1.266  | 5.340 | 0.064  | 0.055 | 0.550 | 0.206 |
| 19                                                         | MUKUR-A    | 0.023 | 0.003 | 0.000 | 3.319 | 0.001 | 0.000 | 0.009 | 75.396 | 6.135 | 8.390  | 1.006  | 5.392 | 0.056  | 0.017 | 0.177 | 0.061 |
| 20                                                         | MUKUR-B    | 0.013 | 0.001 | 0.000 | 3.461 | 0.001 | 0.000 | 0.004 | 78.365 | 5.912 | 7.499  | 1.738  | 2.715 | 0.053  | 0.019 | 0.178 | 0.032 |
| 21                                                         | Mutalani   | 0.028 | 0.008 | 0.005 | 4.311 | 0.002 | 0.001 | 0.010 | 77.721 | 4.538 | 6.189  | 1.098  | 4.597 | 0.059  | 0.153 | 0.820 | 0.439 |
| 22                                                         | Mwea       | 0.006 | 0.001 | 0.000 | 3.081 | 0.000 | 0.000 | 0.004 | 72.637 | 4.375 | 12.607 | 1.607  | 5.398 | 0.036  | 0.008 | 0.160 | 0.057 |
| 23                                                         | Nakuru     | 0.059 | 0.014 | 0.006 | 4.288 | 0.008 | 0.003 | 0.017 | 73.509 | 6.485 | 8.379  | 1.240  | 5.093 | 0.083  | 0.070 | 0.489 | 0.177 |
| 24                                                         | Naro-Moru  | 0.010 | 0.001 | 0.000 | 2.232 | 0.000 | 0.000 | 0.002 | 78.791 | 6.050 | 7.411  | 1.699  | 3.579 | 0.039  | 0.014 | 0.128 | 0.033 |
| 25                                                         | Nyeri      | 0.012 | 0.000 | 0.000 | 2.654 | 0.000 | 0.000 | 0.003 | 77.621 | 7.335 | 6.537  | 1.299  | 3.972 | 0.040  | 0.037 | 0.362 | 0.109 |
| 26                                                         | Ruiru      | 0.056 | 0.006 | 0.004 | 2.995 | 0.008 | 0.002 | 0.016 | 79.782 | 4.537 | 5.836  | 0.824  | 4.352 | 0.234  | 0.173 | 0.823 | 0.295 |
| 27                                                         | Sagana     | 0.009 | 0.001 | 0.000 | 2.862 | 0.000 | 0.000 | 0.005 | 80.363 | 5.071 | 6.014  | 1.642  | 3.573 | 0.049  | 0.031 | 0.295 | 0.065 |
| 28                                                         | Sipili     | 0.048 | 0.018 | 0.006 | 4.600 | 0.015 | 0.008 | 0.036 | 76.799 | 4.688 | 6.830  | 0.883  | 4.356 | 0.112  | 0.198 | 0.971 | 0.344 |
| 29                                                         | Sweetwater | 0.006 | 0.000 | 0.000 | 2.798 | 0.000 | 0.000 | 0.003 | 73.729 | 5.790 | 11.050 | 1.395  | 4.850 | 0.046  | 0.014 | 0.235 | 0.069 |
| 30                                                         | Thika      | 0.020 | 0.003 | 0.001 | 3.637 | 0.002 | 0.001 | 0.012 | 72.981 | 9.742 | 5.819  | 1.199  | 5.652 | 0.071  | 0.046 | 0.561 | 0.238 |

*Table 5 – GIS interpolated data and the corresponding z-scores for the initial normalized absorbance, precipitation and temperature at each site.*

|    | Location         | GIS Interpolated |          | Initial  | Final    | z-scores of data |          |          |
|----|------------------|------------------|----------|----------|----------|------------------|----------|----------|
|    |                  | Avg P/yr         | Avg T/yr | Normed A | Normed A | Initial-A        | Avg P/yr | Avg T/yr |
| 1  | Baringo-Kabarnet | 112              | 16.9     | 0.1537   | 0.1452   | 1.28835          | 1.41266  | -0.76586 |
| 2  | Bomet            | 103              | 17.4     | 0.1529   | 0.1488   | 1.09515          | 0.99898  | -0.41435 |
| 3  | Elementaita      | 57               | 17.5     | 0.1484   | 0.1482   | 0.04531          | -1.11542 | -0.3583  |
| 4  | Emali            | 58               | 21.6     | 0.1457   | 0.1479   | -0.59068         | -1.06946 | 2.13281  |
| 5  | Equator-Nanyuki  | 67               | 16.1     | 0.1470   | 0.1424   | -0.28947         | -0.65577 | -1.2447  |
| 6  | Gachika          | 83               | 17.8     | 0.1503   | 0.1475   | 0.49082          | 0.07967  | -0.17998 |
| 7  | Kabiruni-Nyeri   | 77               | 17.6     | 0.1498   | 0.1497   | 0.37283          | -0.19612 | -0.33794 |
| 8  | Kihato           | 65               | 16.5     | 0.1486   | 0.1479   | 0.09301          | -0.7477  | -0.98489 |
| 9  | Likii            | 67               | 16.3     | 0.1551   | 0.1421   | 1.6161           | -0.65577 | -1.11737 |
| 10 | Loitoktok        | 85               | 17.9     | 0.1414   | 0.1478   | -1.5968          | 0.1716   | -0.12905 |
| 11 | Mahigaini        | 95               | 19.9     | 0.1511   | 0.1490   | 0.68086          | 0.63126  | 1.09865  |
| 12 | Makuyu           | 83               | 19.9     | 0.1420   | 0.1409   | -1.47129         | 0.07967  | 1.10886  |
| 13 | Maragua          | 93               | 20.0     | 0.1494   | 0.1446   | 0.27556          | 0.53932  | 1.13435  |
| 14 | Matanya          | 64               | 16.6     | 0.1438   | 0.1462   | -1.03337         | -0.79367 | -0.90848 |
| 15 | Matuu            | 60               | 21.0     | 0.1467   | 0.1514   | -0.35044         | -0.97753 | 1.75074  |
| 16 | Mbooni           | 96               | 17.7     | 0.1434   | 0.1480   | -1.14577         | 0.67722  | -0.24624 |
| 17 | Meru             | 151              | 18.4     | 0.1521   | 0.1473   | 0.92063          | 3.20531  | 0.14604  |
| 18 | Muhotetu         | 60               | 15.7     | 0.1535   | 0.1423   | 1.24449          | -0.97753 | -1.46887 |
| 19 | MUKURWE-INI-A    | 110              | 17.6     | 0.1481   | 0.1462   | -0.04274         | 1.32073  | -0.28188 |
| 20 | MUKURWE-INI-B    | 110              | 17.6     | 0.1447   | 0.1467   | -0.83218         | 1.32073  | -0.28188 |
| 21 | Mutulani         | 54               | 19.3     | 0.1483   | 0.1465   | 0.00653          | -1.25332 | 0.71658  |
| 22 | Mwea             | 101              | 19.9     | 0.1460   | 0.1413   | -0.53318         | 0.90705  | 1.07322  |
| 23 | Nakuru           | 76               | 17.7     | 0.1531   | 0.1461   | 1.13712          | -0.24208 | -0.24624 |
| 24 | Naro_Moru        | 69               | 16.3     | 0.1400   | 0.1537   | -1.93327         | -0.56384 | -1.12751 |
| 25 | Nyeri            | 81               | 17.7     | 0.1458   | 0.1466   | -0.57014         | -0.01226 | -0.25132 |
| 26 | Ruiru            | 66               | 19.4     | 0.1522   | 0.1477   | 0.9376           | -0.70174 | 0.81341  |
| 27 | Sagana           | 91               | 20.8     | 0.1414   | 0.1486   | -1.60663         | 0.44739  | 1.64376  |
| 28 | Sipili           | 67               | 16.3     | 0.1504   | 0.1460   | 0.51403          | -0.65577 | -1.13772 |
| 29 | Sweet_Waters     | 64               | 16.4     | 0.1548   | 0.1444   | 1.55447          | -0.79367 | -1.04095 |
| 30 | Thika            | 73               | 19.6     | 0.1471   | (moldy)  | -0.27694         | -0.37998 | 0.90511  |

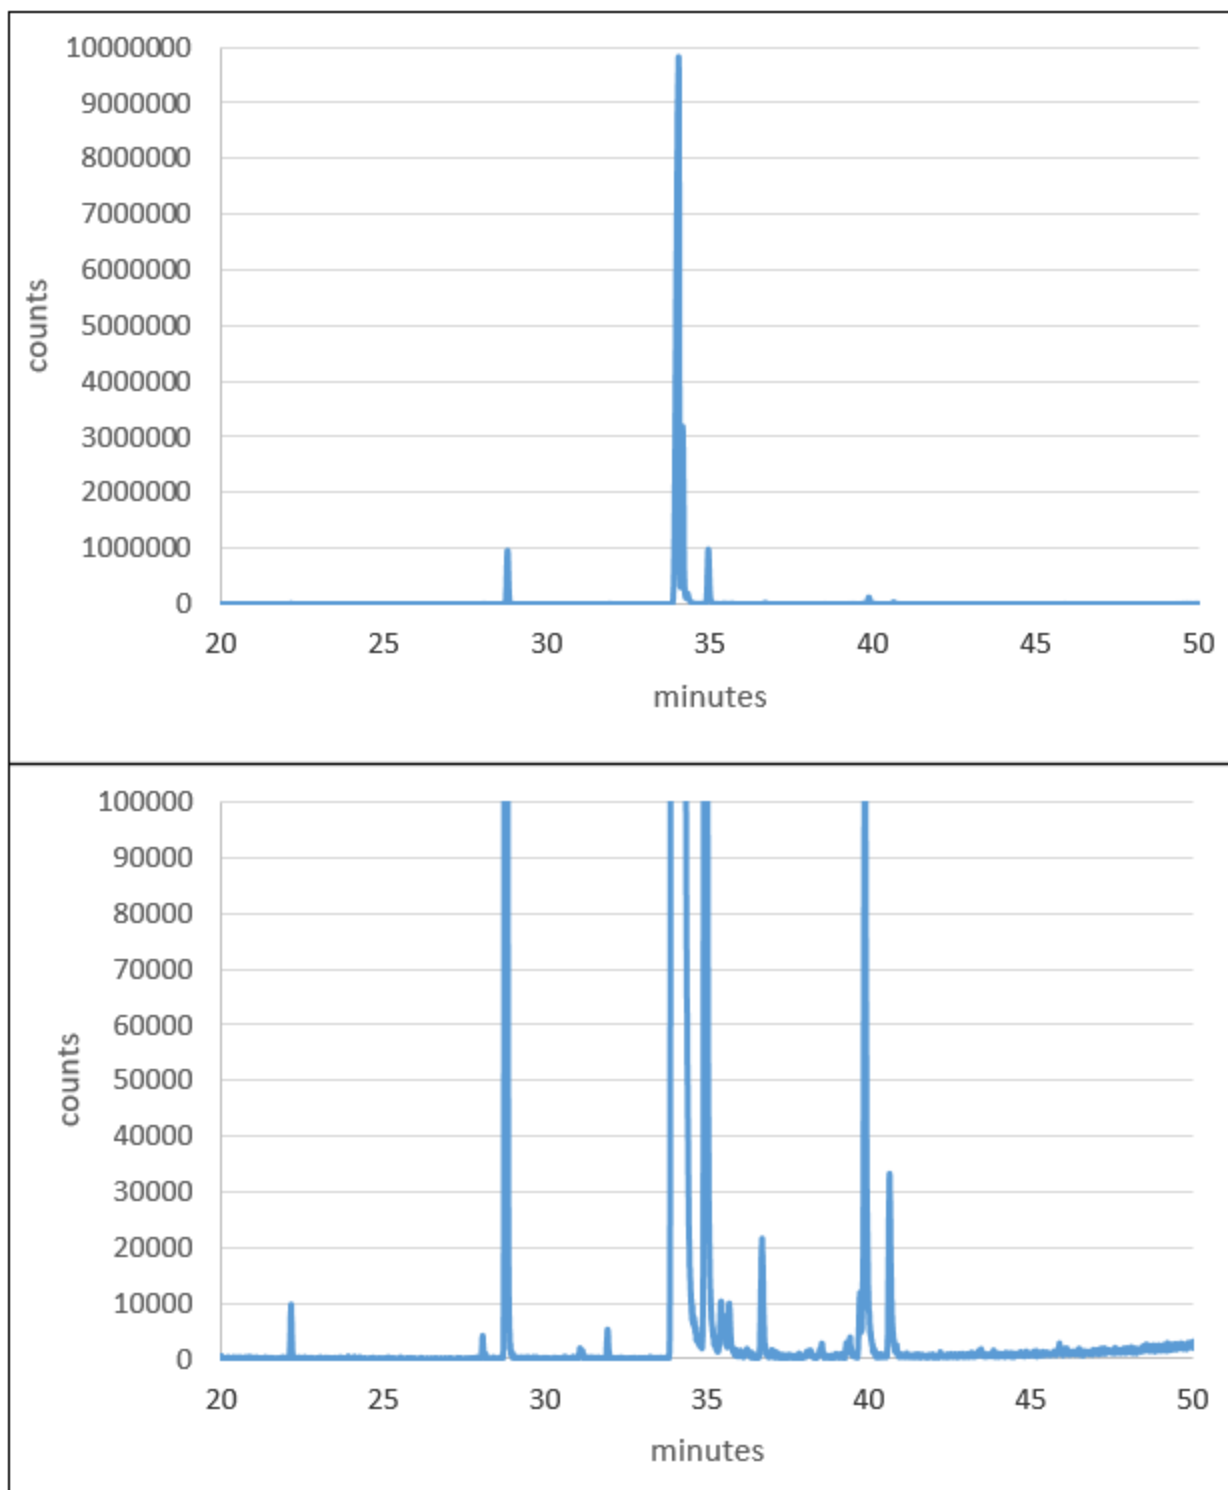

*Fig. 1 – Example TICs using oil from a Baringo nut, sampled and analyzed during December 2017. Lower plot is magnified by 100X to reveal the FAME peaks with low counts.*



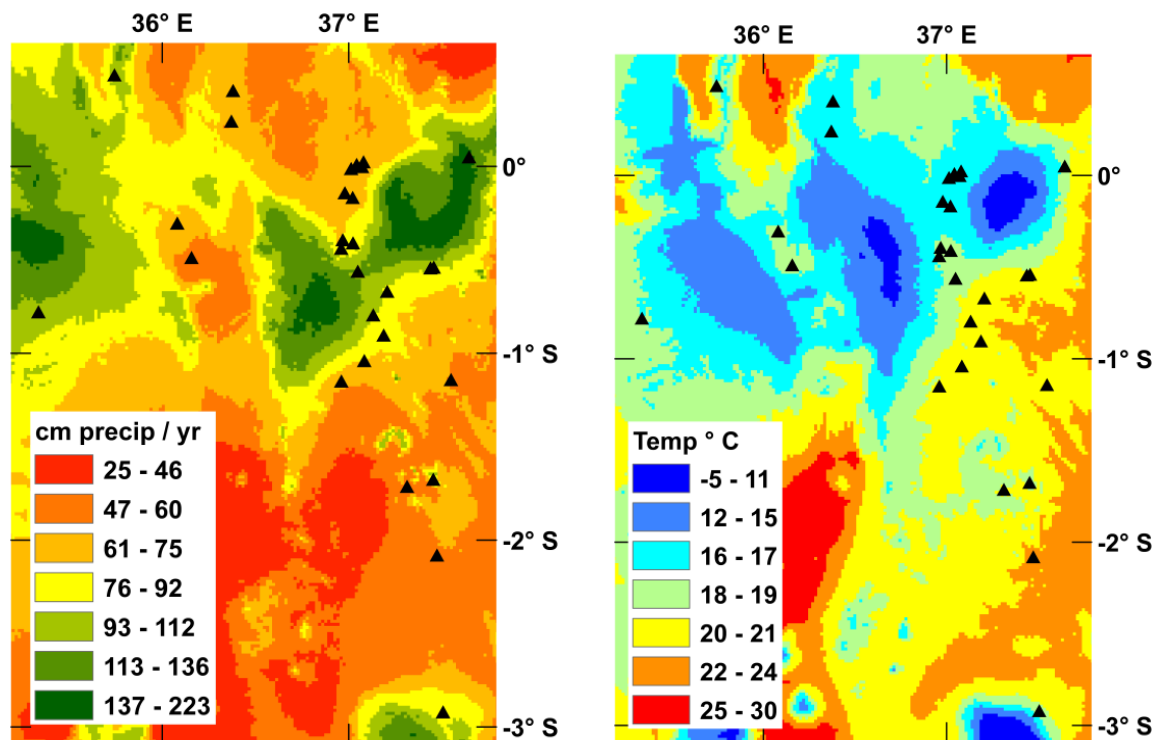

*Fig. 2a – Interpolated map of mean annual precipitation (triangles are the study sites); and  
 Fig. 2b – Interpolated map of mean annual temperature, developed using ArcGIS v 10.4.1  
 with Spatial Analyst Extension and 1 km<sup>2</sup> resolution climate data from <http://www.worldclim.org/>*

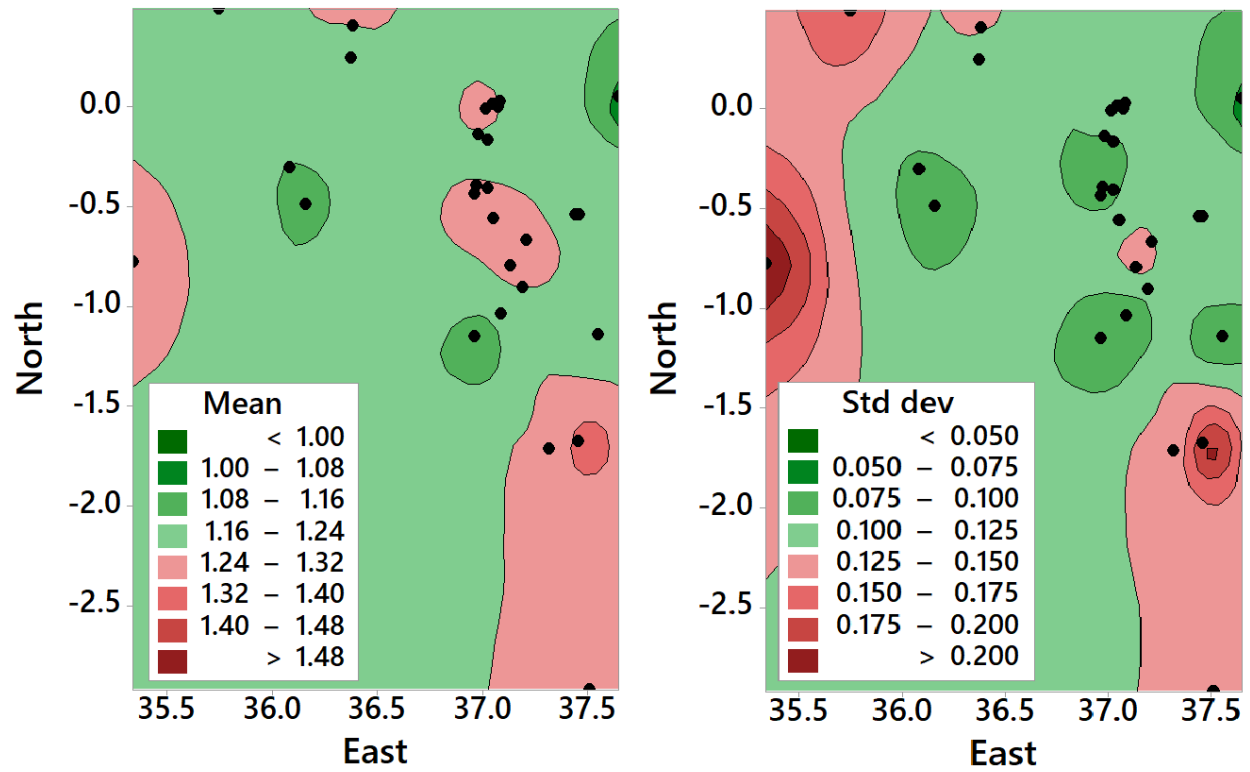

*Fig. 3a – Interpolated maps of the morphological variation (length to width ratio) and (3b) its standard deviation, illustrating a relationship (especially in the variation of the ratio) with the geography and/or local climate. (Maps created using Minitab 18 and data measured from photographs using ImageJ.)*

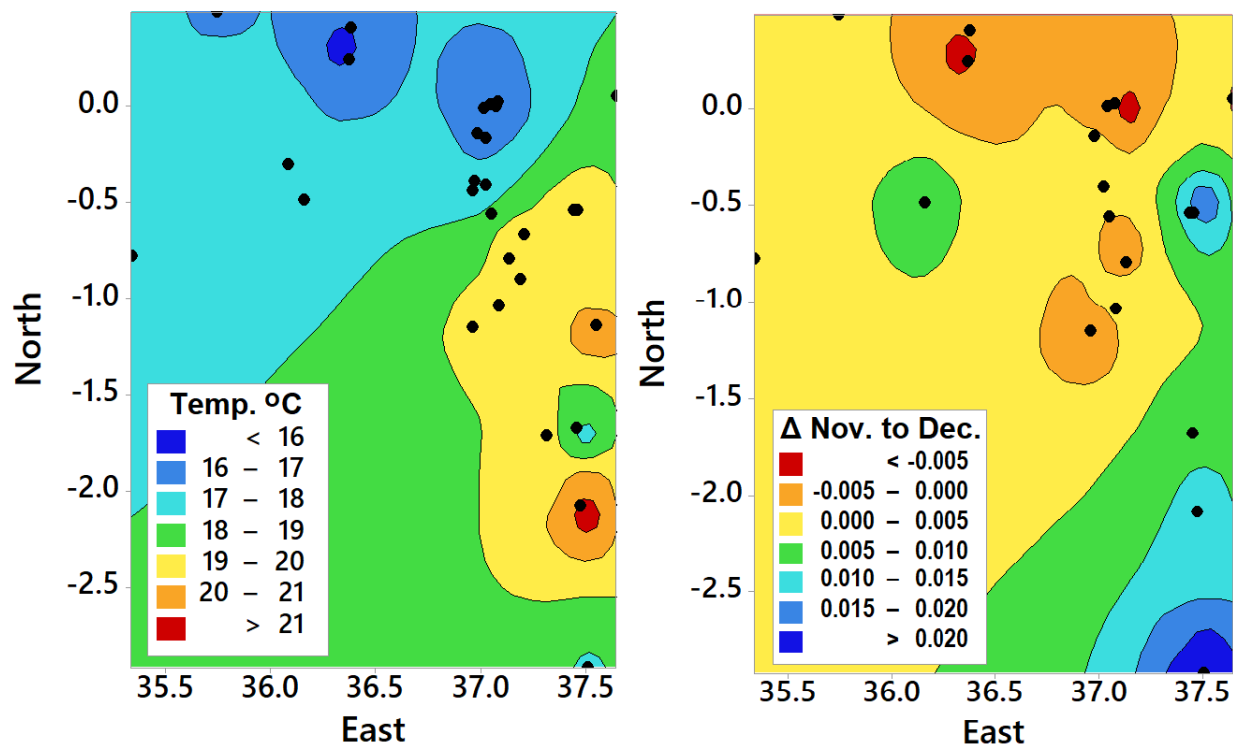

Fig. 4a – Interpolated maps of the mean annual temperature at each site and (4b) the gain (loss) in the poly-unsaturation proxy at  $3009.6\text{ cm}^{-1}$ , illustrating the greatest gains in unsaturation occurred with nuts placed in  $0^{\circ}\text{C}$  storage from sites that have the highest annual temperatures. (Maps created using Minitab 18 and temperature data from ArcGIS v 10.4.1 interpolations shown in Supplementary Material Figure 2b and Supplementary Table 5.)
